# Supplementary material for: Comparative Genome Analysis of Megasphaera sp. Reveals Niche Specialization and Its Potential Role in the Human Gut
Source: PLoS One. 2013 Nov 18;8(11):e79353. doi: 10.1371/journal.pone.0079353 (PMC3832451; doi:10.1371/journal.pone.0079353)
Supplement: Table S4 — MinPath analysis results for Megasphaera elsdenii DSM20460. Legend: The MinPath results are interpreted as follows. Naive 1 or 0: the pathway is reconstructed, or not, by the naive mapping approach; MinPath 1 or 0: 1-the pathway is kept, 0- removed by MinPath; fam0: the total number of families involved in the corresponding pathway; fam-found: the total number of involved families that are annotated; name: the description of the corresponding subsystem. (XLS) [file pone.0079353.s005.xls]

## Sheet: Sheet1
Supplementary table S4: Result of MinPath analysis for Megaspheara elsdenii DSM20460.
Isolate	naive	MinPath	Famlies in subsystem (fam0)	Famlies in subsystem found (fam-found)	Name
Megasphaera elsdenii DSM20460	1	1	62	2	Hydrogenases
Megasphaera elsdenii DSM20460	1	1	438	39	Transporters In Models
Megasphaera elsdenii DSM20460	1	1	29	9	De Novo Purine Biosynthesis
Megasphaera elsdenii DSM20460	1	1	48	4	Maltose and Maltodextrin Utilization
Megasphaera elsdenii DSM20460	1	0	7	1	Plasmid replication
Megasphaera elsdenii DSM20460	1	0	33	2	Chitin and N-acetylglucosamine utilization
Megasphaera elsdenii DSM20460	1	1	196	28	Sugar catabolome in Shewanella species
Megasphaera elsdenii DSM20460	1	0	22	1	Hydantoin metabolism
Megasphaera elsdenii DSM20460	1	1	12	3	Novel non-oxidative pathway of Uracil catabolism
Megasphaera elsdenii DSM20460	1	0	20	1	Pyrimidine utilization
Megasphaera elsdenii DSM20460	1	1	64	6	Flavohaemoglobin
Megasphaera elsdenii DSM20460	1	1	332	169	271-Bsub
Megasphaera elsdenii DSM20460	1	1	31	7	Fatty Acid Biosynthesis FASII
Megasphaera elsdenii DSM20460	1	0	32	3	mycolic acid synthesis
Megasphaera elsdenii DSM20460	1	0	45	7	Calvin-Benson cycle
Megasphaera elsdenii DSM20460	1	0	27	1	Glycolate, glyoxylate interconversions
Megasphaera elsdenii DSM20460	1	1	74	8	tRNA modification Archaea
Megasphaera elsdenii DSM20460	1	1	49	9	Thiamin biosynthesis
Megasphaera elsdenii DSM20460	1	0	19	1	Homogentisate pathway of aromatic compound degradation
Megasphaera elsdenii DSM20460	1	0	17	4	Ammonia assimilation
Megasphaera elsdenii DSM20460	1	0	11	1	Glycine reductase, sarcosine reductase and betaine reductase
Megasphaera elsdenii DSM20460	1	1	26	1	Putative hemin transporter
Megasphaera elsdenii DSM20460	1	0	11	1	Wyeosine-MimG Biosynthesis
Megasphaera elsdenii DSM20460	1	0	40	10	pyrimidine conversions
Megasphaera elsdenii DSM20460	1	0	38	10	pyrimidine conversions v2
Megasphaera elsdenii DSM20460	1	0	62	1	Flagellum
Megasphaera elsdenii DSM20460	1	1	16	5	YHI9
Megasphaera elsdenii DSM20460	1	0	41	1	Nitrate and nitrite ammonification
Megasphaera elsdenii DSM20460	1	1	45	16	DNA-replication
Megasphaera elsdenii DSM20460	1	1	14	5	DNA Repair Base Excision
Megasphaera elsdenii DSM20460	1	0	13	2	EC49-61
Megasphaera elsdenii DSM20460	1	0	29	7	Ammonium metabolism H. pylori
Megasphaera elsdenii DSM20460	1	1	27	8	Glutamine, Glutamate, Aspartate and Asparagine Biosynthesis
Megasphaera elsdenii DSM20460	1	1	7	1	Carbon Starvation
Megasphaera elsdenii DSM20460	1	0	17	3	CobW
Megasphaera elsdenii DSM20460	1	1	1	1	Two-component sensor regulator linked to Carbon Starvation Protein A
Megasphaera elsdenii DSM20460	1	1	45	5	Polyhydroxybutyrate metabolism
Megasphaera elsdenii DSM20460	1	0	42	4	Staphylococcal pathogenicity islands SaPI
Megasphaera elsdenii DSM20460	1	1	22	5	Bacterial RNA-metabolizing Zn-dependent hydrolases
Megasphaera elsdenii DSM20460	1	1	34	13	Conserved gene cluster associated with Met-tRNA formyltransferase
Megasphaera elsdenii DSM20460	1	1	25	7	Ribosome biogenesis bacterial
Megasphaera elsdenii DSM20460	1	0	80	22	rRNA methylation in clusters
Megasphaera elsdenii DSM20460	1	1	60	2	Formate hydrogenase
Megasphaera elsdenii DSM20460	1	0	18	2	Lactate utilization
Megasphaera elsdenii DSM20460	1	0	15	2	Competence or DNA damage-inducible protein CinA and related protein families
Megasphaera elsdenii DSM20460	1	1	40	17	DNA repair, bacterial
Megasphaera elsdenii DSM20460	1	0	15	5	DNA repair, bacterial RecFOR pathway
Megasphaera elsdenii DSM20460	1	1	26	6	Lysine Biosynthesis DAP Pathway
Megasphaera elsdenii DSM20460	1	1	73	15	Folate Biosynthesis
Megasphaera elsdenii DSM20460	1	1	28	2	Beta-Glucoside Metabolism
Megasphaera elsdenii DSM20460	1	0	21	2	PTS uptake system scrtach
Megasphaera elsdenii DSM20460	1	0	53	5	tRNA modification Archaea Henri
Megasphaera elsdenii DSM20460	1	1	88	26	tRNA modification Bacteria
Megasphaera elsdenii DSM20460	1	0	18	4	tRNA modification yeast cytoplasmic
Megasphaera elsdenii DSM20460	1	0	13	4	tRNA modification yeast mitochondrial
Megasphaera elsdenii DSM20460	1	1	16	3	Murein Hydrolases
Megasphaera elsdenii DSM20460	1	0	37	11	Peptidoglycan Biosynthesis
Megasphaera elsdenii DSM20460	1	0	41	11	Peptidoglycan Biosynthesis 2
Megasphaera elsdenii DSM20460	1	0	45	3	D-gluconate and ketogluconates metabolism
Megasphaera elsdenii DSM20460	1	1	10	1	Triacylglycerol metabolism
Megasphaera elsdenii DSM20460	1	1	23	2	Respiratory dehydrogenases 1
Megasphaera elsdenii DSM20460	1	0	98	17	Iron-sulfur experimental
Megasphaera elsdenii DSM20460	1	0	21	8	TrmE experimental
Megasphaera elsdenii DSM20460	1	0	18	8	XXBobCopyTrmE
Megasphaera elsdenii DSM20460	1	1	38	1	Central meta-cleavage pathway of aromatic compound degradation
Megasphaera elsdenii DSM20460	1	0	34	4	Glutaredoxins
Megasphaera elsdenii DSM20460	1	1	24	2	Glutathione Redox Metabolism
Megasphaera elsdenii DSM20460	1	1	28	12	Heat shock dnaK gene cluster extended
Megasphaera elsdenii DSM20460	1	0	45	8	Heme temp review
Megasphaera elsdenii DSM20460	1	1	22	5	Hypothetical DUF454
Megasphaera elsdenii DSM20460	1	0	14	4	Auxin biosynthesis
Megasphaera elsdenii DSM20460	1	1	36	7	Tryptophan synthesis
Megasphaera elsdenii DSM20460	1	0	14	1	Type VI secretion systems
Megasphaera elsdenii DSM20460	1	0	4	1	USS-DB-7
Megasphaera elsdenii DSM20460	1	0	42	1	Biogenesis of c-type cytochromes
Megasphaera elsdenii DSM20460	1	0	7	1	Glyoxylate Synthesis
Megasphaera elsdenii DSM20460	1	0	29	3	Glyoxylate bypass
Megasphaera elsdenii DSM20460	1	0	76	11	Serine-glyoxylate cycle
Megasphaera elsdenii DSM20460	1	1	67	4	TCA Cycle
Megasphaera elsdenii DSM20460	1	0	11	2	oxaloacetate to 2-oxoglutarate module
Megasphaera elsdenii DSM20460	1	0	8	2	dTDP-rhamnose synthesis
Megasphaera elsdenii DSM20460	1	1	36	3	Cobalt-zinc-cadmium resistance
Megasphaera elsdenii DSM20460	1	1	4	2	YeiH
Megasphaera elsdenii DSM20460	1	0	23	3	High affinity phosphate transporter and control of PHO regulon
Megasphaera elsdenii DSM20460	1	0	13	1	P uptake (cyanobacteria)
Megasphaera elsdenii DSM20460	1	1	58	9	Phosphate metabolism
Megasphaera elsdenii DSM20460	1	1	13	1	Pyruvate:ferredoxin oxidoreductase
Megasphaera elsdenii DSM20460	1	1	10	3	DNA repair, UvrABC system
Megasphaera elsdenii DSM20460	1	1	41	7	Acetyl-CoA fermentation to Butyrate
Megasphaera elsdenii DSM20460	1	1	10	3	Recycling of Peptidoglycan Amino Acids
Megasphaera elsdenii DSM20460	1	0	12	4	Macromolecular synthesis operon
Megasphaera elsdenii DSM20460	1	1	24	4	CRISPRs
Megasphaera elsdenii DSM20460	1	0	15	1	Gentisare degradation
Megasphaera elsdenii DSM20460	1	0	20	1	Salicylate and gentisate catabolism
Megasphaera elsdenii DSM20460	1	0	13	1	Unsaturated Fatty Acid Metabolism
Megasphaera elsdenii DSM20460	1	1	49	4	Oxidative stress
Megasphaera elsdenii DSM20460	1	1	95	25	YgfZ
Megasphaera elsdenii DSM20460	1	0	29	8	YgfZ-Fe-S
Megasphaera elsdenii DSM20460	1	0	28	8	YgfZ-Fe-S clustering
Megasphaera elsdenii DSM20460	1	1	5	1	Ribosome activity modulation
Megasphaera elsdenii DSM20460	1	1	9	4	COG0451
Megasphaera elsdenii DSM20460	1	1	42	4	Ton and Tol transport systems
Megasphaera elsdenii DSM20460	1	1	50	6	Anaerobic respiratory reductases
Megasphaera elsdenii DSM20460	1	0	38	8	Experimental Sulfur transfer Archaea
Megasphaera elsdenii DSM20460	1	1	11	5	Nitrosative stress
Megasphaera elsdenii DSM20460	1	0	32	2	Lactose and Galactose Uptake and Utilization
Megasphaera elsdenii DSM20460	1	0	47	1	Chorismate: Intermediate for synthesis of PAPA antibiotics, PABA, anthranilate, 3-hydroxyanthranilate and more.
Megasphaera elsdenii DSM20460	1	0	6	2	Arginine Deiminase Pathway
Megasphaera elsdenii DSM20460	1	0	63	5	Arginine and Ornithine Degradation
Megasphaera elsdenii DSM20460	1	0	22	6	MLST
Megasphaera elsdenii DSM20460	1	1	48	5	Polyamine Metabolism
Megasphaera elsdenii DSM20460	1	1	18	1	Colanic acid biosynthesis
Megasphaera elsdenii DSM20460	1	0	21	1	Capsular Polysaccharides Biosynthesis and Assembly
Megasphaera elsdenii DSM20460	1	0	28	6	Glycine and Serine Utilization
Megasphaera elsdenii DSM20460	1	0	8	2	Serine Biosynthesis
Megasphaera elsdenii DSM20460	1	0	21	1	Glu-tRNA(Gln) transamidation
Megasphaera elsdenii DSM20460	1	0	67	1	Staphylococcal phi-Mu50B-like prophages
Megasphaera elsdenii DSM20460	1	0	5	2	Acetyl-CoA pathway of CO2 fixation
Megasphaera elsdenii DSM20460	1	1	21	2	C jejuni colonization of chick caeca
Megasphaera elsdenii DSM20460	1	0	32	2	Ethanolamine utilization
Megasphaera elsdenii DSM20460	1	0	14	4	Fermentations: Lactate
Megasphaera elsdenii DSM20460	1	1	22	7	Fermentations: Mixed acid
Megasphaera elsdenii DSM20460	1	0	30	1	Propanediol utilization
Megasphaera elsdenii DSM20460	1	0	58	4	Pyruvate metabolism II: acetyl-CoA, acetogenesis from pyruvate
Megasphaera elsdenii DSM20460	1	0	15	3	Threonine anaerobic catabolism gene cluster
Megasphaera elsdenii DSM20460	1	0	18	4	Fe-S cluster assembly
Megasphaera elsdenii DSM20460	1	0	26	5	Iron-sulfur cluster assembly
Megasphaera elsdenii DSM20460	1	0	11	1	Rrf2 family transcriptional regulators
Megasphaera elsdenii DSM20460	1	1	33	6	Bacterial Cell Division
Megasphaera elsdenii DSM20460	1	0	36	3	Bacterial Cytoskeleton
Megasphaera elsdenii DSM20460	1	1	44	6	Glutathione-regulated potassium-efflux system and associated functions
Megasphaera elsdenii DSM20460	1	1	83	4	Iron acquisition in Vibrio
Megasphaera elsdenii DSM20460	1	1	8	1	Benzoate catabolism
Megasphaera elsdenii DSM20460	1	0	29	1	Benzoate degradation
Megasphaera elsdenii DSM20460	1	0	14	1	Catechol branch of beta-ketoadipate pathway
Megasphaera elsdenii DSM20460	1	0	24	1	D-ribose utilization
Megasphaera elsdenii DSM20460	1	0	33	4	Dihydroxyacetone kinases
Megasphaera elsdenii DSM20460	1	1	16	4	LMPTP YwlE cluster
Megasphaera elsdenii DSM20460	1	0	28	4	Pentose phosphate pathway
Megasphaera elsdenii DSM20460	1	0	26	2	CRnot mitoch clusters Euk 1
Megasphaera elsdenii DSM20460	1	0	24	1	tRNA cmo5U synthesis
Megasphaera elsdenii DSM20460	1	0	21	7	tRNA processing
Megasphaera elsdenii DSM20460	1	0	10	2	Test2
Megasphaera elsdenii DSM20460	1	0	10	2	mnm5U34 biosynthesis bacteria
Megasphaera elsdenii DSM20460	1	0	15	1	D-Tagatose and Galactitol Utilization
Megasphaera elsdenii DSM20460	1	1	46	10	Purine conversions
Megasphaera elsdenii DSM20460	1	0	19	5	COG4319
Megasphaera elsdenii DSM20460	1	0	16	4	DMT transporter
Megasphaera elsdenii DSM20460	1	0	30	6	Experimental-PTPS
Megasphaera elsdenii DSM20460	1	1	17	1	D-Sorbitol(D-Glucitol) and L-Sorbose Utilization
Megasphaera elsdenii DSM20460	1	0	24	4	Cysteine Biosynthesis
Megasphaera elsdenii DSM20460	1	0	38	5	Inorganic Sulfur Assimilation
Megasphaera elsdenii DSM20460	1	0	27	5	Sulfate Assimilation Shewanella
Megasphaera elsdenii DSM20460	1	0	11	3	Sulfate assimilation
Megasphaera elsdenii DSM20460	1	1	13	3	Superpathway of cysteine biosynthesis
Megasphaera elsdenii DSM20460	1	1	15	1	Cyanobacterial Circadian Clock
Megasphaera elsdenii DSM20460	1	0	56	11	Entner-Doudoroff Pathway
Megasphaera elsdenii DSM20460	1	0	42	10	Glycolysis and Gluconeogenesis
Megasphaera elsdenii DSM20460	1	1	33	8	Glycolysis and Gluconeogenesis, including Archaeal enzymes
Megasphaera elsdenii DSM20460	1	0	3	1	Phosphoglycerate mutase protein family
Megasphaera elsdenii DSM20460	1	1	17	4	Deoxyribose and Deoxynucleoside Catabolism
Megasphaera elsdenii DSM20460	1	0	10	1	Sporulation draft
Megasphaera elsdenii DSM20460	1	0	17	4	Zinc regulated enzymes
Megasphaera elsdenii DSM20460	1	0	24	1	Motility of Campylobacter
Megasphaera elsdenii DSM20460	1	1	9	5	NusA-TFII Cluster
Megasphaera elsdenii DSM20460	1	1	14	7	Transcription factors bacterial
Megasphaera elsdenii DSM20460	1	0	7	3	SA hypothetical
Megasphaera elsdenii DSM20460	1	1	62	3	Photorespiration (oxidative C2 cycle)
Megasphaera elsdenii DSM20460	1	1	60	11	NAD and NADP cofactor biosynthesis global
Megasphaera elsdenii DSM20460	1	1	40	7	Pyruvate metabolism I: anaplerotic reactions, PEP
Megasphaera elsdenii DSM20460	1	1	17	1	Gamma-aminobutyrate (GABA) shunt
Megasphaera elsdenii DSM20460	1	0	17	1	Putrescine utilization pathways
Megasphaera elsdenii DSM20460	1	0	22	1	Soluble cytochromes and functionally related electron carriers
Megasphaera elsdenii DSM20460	1	1	24	5	Glycerol and Glycerol-3-phosphate Uptake and Utilization
Megasphaera elsdenii DSM20460	1	0	34	2	Potassium homeostasis
Megasphaera elsdenii DSM20460	1	0	31	2	Potassium homeostasis Pavel
Megasphaera elsdenii DSM20460	1	1	19	2	Phage experimental
Megasphaera elsdenii DSM20460	1	0	57	1	Heme, hemin uptake and utilization systems in GramPositives
Megasphaera elsdenii DSM20460	1	1	7	3	Rubrerythrin
Megasphaera elsdenii DSM20460	1	0	5	2	CR clusters Euk 7 GlucoseP isomerase
Megasphaera elsdenii DSM20460	1	0	26	4	Formaldehyde assimilation: Ribulose monophosphate pathway
Megasphaera elsdenii DSM20460	1	1	28	6	Sucrose Metabolism
Megasphaera elsdenii DSM20460	1	1	34	10	rRNA modification Bacteria
Megasphaera elsdenii DSM20460	1	0	17	4	Redox-dependent regulation of nucleus processes
Megasphaera elsdenii DSM20460	1	0	10	3	Lipopolysaccharide biosynthesis 2
Megasphaera elsdenii DSM20460	1	0	35	3	Rhamnose containing glycans
Megasphaera elsdenii DSM20460	1	1	19	5	D-Galacturonate Utilization
Megasphaera elsdenii DSM20460	1	1	40	2	Bacterial motility:Gliding
Megasphaera elsdenii DSM20460	1	1	23	3	Murein hydrolase regulation and cell death
Megasphaera elsdenii DSM20460	1	0	24	7	NAD regulation
Megasphaera elsdenii DSM20460	1	0	29	1	Translation initiation factors eukaryotic and archaeal
Megasphaera elsdenii DSM20460	1	0	14	5	Leucine Biosynthesis
Megasphaera elsdenii DSM20460	1	1	29	2	Riboflavin, FMN and FAD metabolism
Megasphaera elsdenii DSM20460	1	1	3	2	COG0277
Megasphaera elsdenii DSM20460	1	0	13	1	Pterin carbinolamine dehydratase
Megasphaera elsdenii DSM20460	1	0	32	4	Pterin metabolism 3
Megasphaera elsdenii DSM20460	1	0	15	5	UDP-N-acetylmuramate from Fructose-6-phosphate Biosynthesis
Megasphaera elsdenii DSM20460	1	1	33	7	Biotin biosynthesis
Megasphaera elsdenii DSM20460	1	0	14	2	Carbonate Biomineralization
Megasphaera elsdenii DSM20460	1	0	20	3	Fatty acid degradation regulons
Megasphaera elsdenii DSM20460	1	0	23	3	n-Phenylalkanoic acid degradation
Megasphaera elsdenii DSM20460	1	1	7	1	Phage tail proteins
Megasphaera elsdenii DSM20460	1	0	8	1	Capsular heptose biosynthesis
Megasphaera elsdenii DSM20460	1	1	29	7	LOS core oligosaccharide biosynthesis
Megasphaera elsdenii DSM20460	1	1	72	10	Proline, 4-hydroxyproline uptake and utilization
Megasphaera elsdenii DSM20460	1	0	21	2	Threonine degradation
Megasphaera elsdenii DSM20460	1	1	52	9	Experimental tye
Megasphaera elsdenii DSM20460	1	0	52	9	Heme and Siroheme Biosynthesis
Megasphaera elsdenii DSM20460	1	0	27	8	Queuosine-Archaeosine Biosynthesis
Megasphaera elsdenii DSM20460	1	0	7	2	COG2302
Megasphaera elsdenii DSM20460	1	0	51	14	PROSC
Megasphaera elsdenii DSM20460	1	1	57	7	Sialic Acid Metabolism
Megasphaera elsdenii DSM20460	1	1	25	3	Nudix proteins (nucleoside triphosphate hydrolases)
Megasphaera elsdenii DSM20460	1	1	2	1	Hypothetical Coupled to RecF
Megasphaera elsdenii DSM20460	1	0	12	1	Experimental-FO
Megasphaera elsdenii DSM20460	1	1	37	33	EGS prediction
Megasphaera elsdenii DSM20460	1	1	24	19	Ribosome SSU bacterial
Megasphaera elsdenii DSM20460	1	0	19	2	Phenylalanine synthesis
Megasphaera elsdenii DSM20460	1	1	13	7	Threonine and Homoserine Biosynthesis
Megasphaera elsdenii DSM20460	1	0	18	7	ZZ gjo scratch
Megasphaera elsdenii DSM20460	1	0	23	6	COG2363
Megasphaera elsdenii DSM20460	1	1	46	4	Sporulation gene orphans
Megasphaera elsdenii DSM20460	1	1	31	2	Campylobacter Iron Metabolism
Megasphaera elsdenii DSM20460	1	0	33	3	Phosphate-binding DING proteins
Megasphaera elsdenii DSM20460	1	1	49	5	cAMP signaling in bacteria
Megasphaera elsdenii DSM20460	1	0	8	1	Adenosyl nucleosidases
Megasphaera elsdenii DSM20460	1	0	32	7	Arginine Biosynthesis
Megasphaera elsdenii DSM20460	1	1	36	7	Arginine Biosynthesis extended
Megasphaera elsdenii DSM20460	1	0	37	4	Sugar utilization in Thermotogales
Megasphaera elsdenii DSM20460	1	0	30	1	Xylose utilization
Megasphaera elsdenii DSM20460	1	1	18	4	Methylglyoxal Metabolism
Megasphaera elsdenii DSM20460	1	1	18	4	Pyridoxin (Vitamin B6) Biosynthesis
Megasphaera elsdenii DSM20460	1	1	84	16	Coenzyme B12 biosynthesis
Megasphaera elsdenii DSM20460	1	0	21	1	Bacterial cyanide production and tolerance mechanisms
Megasphaera elsdenii DSM20460	1	0	21	3	Transport of Iron
Megasphaera elsdenii DSM20460	1	0	33	1	Benzoate transport and degradation cluster
Megasphaera elsdenii DSM20460	1	0	86	2	Chorismate Synthesis
Megasphaera elsdenii DSM20460	1	1	50	4	Common Pathway For Synthesis of Aromatic Compounds (DAHP synthase to chorismate)
Megasphaera elsdenii DSM20460	1	0	39	3	Type IV pilus
Megasphaera elsdenii DSM20460	1	1	13	5	Sex pheromones in Enterococcus faecalis and other Firmicutes
Megasphaera elsdenii DSM20460	1	0	6	1	Muconate lactonizing enzyme family
Megasphaera elsdenii DSM20460	1	0	15	1	Formate dehydrogenase
Megasphaera elsdenii DSM20460	1	0	9	1	Periplasmic Stress Response
Megasphaera elsdenii DSM20460	1	1	8	4	Arsenic resistance
Megasphaera elsdenii DSM20460	1	0	31	1	Na+ translocating decarboxylases and related biotin-dependent enzymes
Megasphaera elsdenii DSM20460	1	1	28	11	Histidine Biosynthesis
Megasphaera elsdenii DSM20460	1	0	21	8	XXBOB
Megasphaera elsdenii DSM20460	1	1	2	2	XXBOB2
Megasphaera elsdenii DSM20460	1	1	10	5	Protein chaperones
Megasphaera elsdenii DSM20460	1	0	20	3	Proteolysis in bacteria, ATP-dependent
Megasphaera elsdenii DSM20460	1	1	17	5	Anaerobic benzoate metabolism
Megasphaera elsdenii DSM20460	1	0	62	4	Dehydrogenase complexes
Megasphaera elsdenii DSM20460	1	0	3	1	Programmed frameshift
Megasphaera elsdenii DSM20460	1	1	29	18	Translation factors bacterial
Megasphaera elsdenii DSM20460	1	0	75	1	Phenylalanine and Tyrosine Branches from Chorismate
Megasphaera elsdenii DSM20460	1	0	73	1	Phenylalanine and Tyrosine Branches from Chorismate (Phoenix copy)
Megasphaera elsdenii DSM20460	1	1	57	8	ECF class transporters
Megasphaera elsdenii DSM20460	1	0	32	3	COG3146 experimental
Megasphaera elsdenii DSM20460	1	1	31	13	Glycerolipid and Glycerophospholipid Metabolism in Bacteria
Megasphaera elsdenii DSM20460	1	1	27	4	Acetoin, butanediol metabolism
Megasphaera elsdenii DSM20460	1	1	24	8	Coenzyme A Biosynthesis
Megasphaera elsdenii DSM20460	1	0	37	3	Teichoic and lipoteichoic acids biosynthesis
Megasphaera elsdenii DSM20460	1	0	8	2	Pterin biosynthesis
Megasphaera elsdenii DSM20460	1	0	7	1	Pterin metabolism
Megasphaera elsdenii DSM20460	1	0	14	1	Poly-gamma-glutamate biosynthesis
Megasphaera elsdenii DSM20460	1	0	11	4	Q-derivative
Megasphaera elsdenii DSM20460	1	0	43	4	Transport of Nickel and Cobalt
Megasphaera elsdenii DSM20460	1	0	18	2	Methionine Salvage
Megasphaera elsdenii DSM20460	1	1	12	4	S-Adenosylhomocysteine and S-Methylthioadenosine metabolism
Megasphaera elsdenii DSM20460	1	0	12	3	Glycogen metabolism
Megasphaera elsdenii DSM20460	1	1	20	8	De Novo Pyrimidine Synthesis
Megasphaera elsdenii DSM20460	1	0	31	4	Vibrio Polysaccharide (VPS) Biosynthesis
Megasphaera elsdenii DSM20460	1	0	28	1	Archaeal lipids
Megasphaera elsdenii DSM20460	1	1	33	5	Isoprenoid Biosynthesis
Megasphaera elsdenii DSM20460	1	0	12	1	Mevalonate Branch of Isoprenoid Biosynthesis
Megasphaera elsdenii DSM20460	1	0	16	1	Staphylococcus aureus hypothetical repetitive gene loci
Megasphaera elsdenii DSM20460	1	0	11	1	(GlcNAc)2 Catabolic Operon
Megasphaera elsdenii DSM20460	1	1	21	4	Purine Utilization
Megasphaera elsdenii DSM20460	1	1	14	6	General secretory pathway (Sec-SRP) complex (TC 3.A.5.1.1)
Megasphaera elsdenii DSM20460	1	0	10	3	HtrA and Sec secretion
Megasphaera elsdenii DSM20460	1	0	41	1	Branched chain amino acid degradation regulons
Megasphaera elsdenii DSM20460	1	0	41	1	Leucine Degradation and HMG-CoA Metabolism
Megasphaera elsdenii DSM20460	1	0	13	1	Isobutyryl-CoA to Propionyl-CoA Module
Megasphaera elsdenii DSM20460	1	0	42	4	Valine degradation
Megasphaera elsdenii DSM20460	1	0	9	4	A Gram-positive cluster that relates ribosomal protein L28P to a set of uncharacterized proteins
Megasphaera elsdenii DSM20460	1	1	23	14	Universal GTPases
Megasphaera elsdenii DSM20460	1	0	25	1	Carbon monoxide induced hydrogenase
Megasphaera elsdenii DSM20460	1	0	43	1	Multiple resistance and pH-related antiporter Mrp
Megasphaera elsdenii DSM20460	1	0	14	6	Iojap
Megasphaera elsdenii DSM20460	1	0	13	4	SA:14-24
Megasphaera elsdenii DSM20460	1	1	50	19	tRNA aminoacylation
Megasphaera elsdenii DSM20460	1	0	16	1	N-linked Glycosylation in Bacteria
Megasphaera elsdenii DSM20460	1	0	10	2	Allantoin Utilization
Megasphaera elsdenii DSM20460	1	0	11	3	Allantoin degradation
Megasphaera elsdenii DSM20460	1	0	14	3	D-galactarate, D-glucarate and D-glycerate catabolism
Megasphaera elsdenii DSM20460	1	0	18	3	Glycerate metabolism
Megasphaera elsdenii DSM20460	1	0	18	3	Glyoxylate-Hydroxypyruvate Conversion
Megasphaera elsdenii DSM20460	1	0	17	2	The Tartronate Semialdehyde Hub
Megasphaera elsdenii DSM20460	1	1	5	3	PROSC Class
Megasphaera elsdenii DSM20460	1	1	7	4	Proline Synthesis
Megasphaera elsdenii DSM20460	1	0	13	1	Lipid A-Ara4N pathway ( Polymyxin resistance )
Megasphaera elsdenii DSM20460	1	1	39	5	Selenocysteine metabolism
Megasphaera elsdenii DSM20460	1	0	47	4	Isoleucine degradation
Megasphaera elsdenii DSM20460	1	1	24	4	Butanol Biosynthesis
Megasphaera elsdenii DSM20460	1	0	16	4	Sugar utilization in Thermotoga
Megasphaera elsdenii DSM20460	1	1	19	3	Protein degradation
Megasphaera elsdenii DSM20460	1	0	9	2	2-phosphoglycolate salvage
Megasphaera elsdenii DSM20460	1	1	12	4	linker unit-arabinogalactan synthesis
Megasphaera elsdenii DSM20460	1	0	8	1	Lacto-N-Biose I and Galacto-N-Biose Metabolic Pathway
Megasphaera elsdenii DSM20460	1	0	15	1	Dissimilatory nitrite reductase
Megasphaera elsdenii DSM20460	1	0	11	1	Synechocystis experimental
Megasphaera elsdenii DSM20460	1	1	20	1	ATP-dependent RNA helicases, bacterial
Megasphaera elsdenii DSM20460	1	1	33	1	Mannose Metabolism
Megasphaera elsdenii DSM20460	1	1	26	11	KDO2-Lipid A biosynthesis
Megasphaera elsdenii DSM20460	1	0	10	2	pVir Plasmid of Campylobacter
Megasphaera elsdenii DSM20460	1	0	16	5	slr0575
Megasphaera elsdenii DSM20460	1	0	6	1	Utilization of glutathione as a sulphur source
Megasphaera elsdenii DSM20460	1	1	7	1	Flavodoxin
Megasphaera elsdenii DSM20460	1	1	23	10	Branched-Chain Amino Acid Biosynthesis
Megasphaera elsdenii DSM20460	1	0	12	3	Alanine biosynthesis
Megasphaera elsdenii DSM20460	1	0	11	1	Asp-tRNA(Asn) transamidation
Megasphaera elsdenii DSM20460	1	1	14	7	Two cell division clusters relating to chromosome partitioning
Megasphaera elsdenii DSM20460	1	0	12	2	Fumarate respiration and methabolism
Megasphaera elsdenii DSM20460	1	0	10	2	Hexitol degradation
Megasphaera elsdenii DSM20460	1	0	22	1	N-Acetyl-Galactosamine and Galactosamine Utilization
Megasphaera elsdenii DSM20460	1	1	8	1	Cluster-based Subsystem Grouping Hypotheticals - perhaps Proteosome Related
Megasphaera elsdenii DSM20460	1	0	24	8	Bacterial short NadE
Megasphaera elsdenii DSM20460	1	0	24	8	Bifunctional NMNAT-ADPRPs
Megasphaera elsdenii DSM20460	1	1	20	1	Multidrug Resistance Efflux Pumps
Megasphaera elsdenii DSM20460	1	1	9	1	Cold shock, CspA family of proteins
Megasphaera elsdenii DSM20460	1	0	26	3	Transcription initiation, bacterial sigma factors
Megasphaera elsdenii DSM20460	1	1	4	2	Streptococcal Hyaluronic Acid Capsule
Megasphaera elsdenii DSM20460	1	1	9	3	Teichuronic acid biosynthesis
Megasphaera elsdenii DSM20460	1	1	19	2	ZZ gjo need homes
Megasphaera elsdenii DSM20460	1	0	10	3	Nonmevalonate Branch of Isoprenoid Biosynthesis
Megasphaera elsdenii DSM20460	1	1	10	8	F0F1-type ATP synthase
Megasphaera elsdenii DSM20460	1	0	31	3	Methanopterin biosynthesis2
Megasphaera elsdenii DSM20460	1	0	11	2	Translation elongation factor G family
Megasphaera elsdenii DSM20460	1	1	23	2	Lysine degradation
Megasphaera elsdenii DSM20460	1	1	3	1	Recycling of Peptidoglycan Amino Sugars
Megasphaera elsdenii DSM20460	1	1	4	2	NAD consumption
Megasphaera elsdenii DSM20460	1	1	17	1	Fructose utilization
Megasphaera elsdenii DSM20460	1	0	11	2	Galactose-inducible PTS
Megasphaera elsdenii DSM20460	1	1	17	5	Vibrio Core Oligosaccharide Biosynthesis
Megasphaera elsdenii DSM20460	1	0	10	4	2-oxoisovalerate to 2-isopropyl-3-oxosuccinate module
Megasphaera elsdenii DSM20460	1	1	35	32	Ribosome LSU bacterial
Megasphaera elsdenii DSM20460	1	1	6	3	DNA repair, bacterial MutL-MutS system
Megasphaera elsdenii DSM20460	1	0	17	6	Methionine Degradation
Megasphaera elsdenii DSM20460	1	1	7	1	Experimental -Creatinine degradation
Megasphaera elsdenii DSM20460	1	0	19	2	Mannitol Utilization
Megasphaera elsdenii DSM20460	1	0	23	1	Ribitol, Xylitol, Arabitol, Mannitol and Sorbitol utilization
Megasphaera elsdenii DSM20460	1	1	39	14	Methionine Biosynthesis
Megasphaera elsdenii DSM20460	1	0	23	5	COG1565
Megasphaera elsdenii DSM20460	1	0	20	6	Acetone Butanol Ethanol Synthesis
Megasphaera elsdenii DSM20460	1	1	23	3	Proteasome bacterial
Megasphaera elsdenii DSM20460	1	0	20	2	Streptococcus agalactiae virulome
Megasphaera elsdenii DSM20460	1	0	13	4	Folate transporters
Megasphaera elsdenii DSM20460	1	0	5	1	CR clusters Euk 1
Megasphaera elsdenii DSM20460	1	0	6	2	Tolerance to Furfural-Induced Stress
Megasphaera elsdenii DSM20460	1	1	11	6	uridine kinase cluster 1
Megasphaera elsdenii DSM20460	1	1	9	2	Acriflavin resistance cluster
Megasphaera elsdenii DSM20460	1	0	6	1	Frankia C1 regulator
Megasphaera elsdenii DSM20460	1	1	11	2	Ribonucleotide reduction
Megasphaera elsdenii DSM20460	1	1	8	3	RNA polymerase bacterial
Megasphaera elsdenii DSM20460	1	1	16	2	Exopolysaccharide Biosynthesis
Megasphaera elsdenii DSM20460	1	0	33	14	Cobalamin synthesis
Megasphaera elsdenii DSM20460	1	0	31	1	Alginate metabolism
Megasphaera elsdenii DSM20460	1	1	19	1	Protocatechuate branch of beta-ketoadipate pathway
Megasphaera elsdenii DSM20460	1	0	11	1	Major Outer Membrane Proteins
Megasphaera elsdenii DSM20460	1	0	7	1	Outer membrane
Megasphaera elsdenii DSM20460	1	1	7	2	YcfH
Megasphaera elsdenii DSM20460	1	1	15	1	DNA repair, bacterial UvrD and related helicases
Megasphaera elsdenii DSM20460	1	0	5	2	Osmoregulation
Megasphaera elsdenii DSM20460	1	0	4	1	Alpha-acetolactate operon
Megasphaera elsdenii DSM20460	1	0	17	1	rRNA modification
Megasphaera elsdenii DSM20460	1	1	9	3	Experimental Iddo 1
Megasphaera elsdenii DSM20460	1	0	21	4	Pyruvate Alanine Serine Interconversions
Megasphaera elsdenii DSM20460	1	0	15	1	Acid resistance mechanisms
Megasphaera elsdenii DSM20460	1	0	10	2	DNA topoisomerases, Type II, ATP-dependent
Megasphaera elsdenii DSM20460	1	0	6	2	Resistance to fluoroquinolones
Megasphaera elsdenii DSM20460	1	0	3	1	Fructose-bisphosphate aldolase protein family
Megasphaera elsdenii DSM20460	1	1	9	1	Adhesion of Campylobacter
Megasphaera elsdenii DSM20460	1	0	18	1	DNA replication, archaeal
Megasphaera elsdenii DSM20460	1	0	18	1	DNA replication, archaeal Isaac
Megasphaera elsdenii DSM20460	1	0	6	1	Glutamate dehydrogenases
Megasphaera elsdenii DSM20460	1	1	13	4	NiFe hydrogenase maturation
Megasphaera elsdenii DSM20460	1	1	2	1	Pectin degradation
Megasphaera elsdenii DSM20460	1	0	10	3	ArsR methyltransferase fusion
Megasphaera elsdenii DSM20460	1	0	7	1	Listeria autolysins
Megasphaera elsdenii DSM20460	1	0	6	1	Sporulation-related Hypotheticals
Megasphaera elsdenii DSM20460	1	1	11	1	Aromatic amino acid interconversions with aryl acids
Megasphaera elsdenii DSM20460	1	0	5	2	Deaminase
Megasphaera elsdenii DSM20460	1	0	10	3	polyprenyl synthesis
Megasphaera elsdenii DSM20460	1	0	10	2	Glycerol fermenation to 1,3-propanediol
Megasphaera elsdenii DSM20460	1	0	5	2	Twin-arginine translocation system
Megasphaera elsdenii DSM20460	1	1	34	1	DNA-binding regulatory proteins, strays
Megasphaera elsdenii DSM20460	1	0	9	1	Polyadenylation bacterial
Megasphaera elsdenii DSM20460	1	1	12	4	Conserved gene cluster possibly involved in RNA metabolism
Megasphaera elsdenii DSM20460	1	0	5	1	LMPTP YfkJ cluster
Megasphaera elsdenii DSM20460	1	1	9	1	DNA structural proteins, bacterial
Megasphaera elsdenii DSM20460	1	1	2	1	Polysaccharide deacetylases
Megasphaera elsdenii DSM20460	1	0	13	1	Transcription factors cyanobacterial RpoD-like sigma factors
Megasphaera elsdenii DSM20460	1	1	18	3	Experimental - Histidine Degradation
Megasphaera elsdenii DSM20460	1	0	16	1	Histidine Degradation
Megasphaera elsdenii DSM20460	1	1	1	1	CR clusters Euk 3
Megasphaera elsdenii DSM20460	1	1	1	1	CR clusters Euk 6 lactateDehB
Megasphaera elsdenii DSM20460	1	0	3	1	ERES Pathogenicity Region
Megasphaera elsdenii DSM20460	1	0	8	1	Stringent Response, (p)ppGpp metabolism
Megasphaera elsdenii DSM20460	1	1	6	1	Streptococcus pyogenes recombinatorial zone
Megasphaera elsdenii DSM20460	1	1	9	6	A Gammaproteobacteria Cluster Relating to Translation
Megasphaera elsdenii DSM20460	1	0	12	4	5-FCL-like protein
Megasphaera elsdenii DSM20460	1	0	15	4	One-carbon metabolism by tetrahydropterines
Megasphaera elsdenii DSM20460	1	0	33	1	Methicillin resistance in Staphylococci
Megasphaera elsdenii DSM20460	1	0	13	1	riboflavin to FAD
Megasphaera elsdenii DSM20460	1	0	12	2	COG1836
Megasphaera elsdenii DSM20460	1	0	3	1	The mdtABCD multidrug resistance cluster
Megasphaera elsdenii DSM20460	1	1	5	3	ABC transporter alkylphosphonate (TC 3.A.1.9.1)
Megasphaera elsdenii DSM20460	1	1	4	1	Glycine Biosynthesis
Megasphaera elsdenii DSM20460	1	0	15	1	Perosamine Synthesis Vibrio
Megasphaera elsdenii DSM20460	1	0	7	1	Protein Acetylation and Deacetylation in Bacteria
Megasphaera elsdenii DSM20460	1	1	4	2	Lipoprotein Biosynthesis
Megasphaera elsdenii DSM20460	1	0	8	2	RNA processing and degradation, bacterial
Megasphaera elsdenii DSM20460	1	1	3	2	RuvABC plus a hypothetical
Megasphaera elsdenii DSM20460	1	0	3	1	Na(+) H(+) antiporter
Megasphaera elsdenii DSM20460	1	0	3	1	NhaA
Megasphaera elsdenii DSM20460	1	1	2	2	Signal peptidase
Megasphaera elsdenii DSM20460	1	0	16	1	Extracellular Polysaccharide Biosynthesis of Streptococci
Megasphaera elsdenii DSM20460	1	0	12	1	Phenazine biosynthesis
Megasphaera elsdenii DSM20460	1	0	6	1	HPr catabolite repression system
Megasphaera elsdenii DSM20460	1	1	2	1	A Hypothetical Protein Related to Proline Metabolism
Megasphaera elsdenii DSM20460	1	0	7	1	CMP-N-acetylneuraminate Biosynthesis
Megasphaera elsdenii DSM20460	1	0	3	1	ZZ rdo scratch
Megasphaera elsdenii DSM20460	1	0	6	1	Iojap AH
Megasphaera elsdenii DSM20460	1	0	20	1	Succinate dehydrogenase
Megasphaera elsdenii DSM20460	1	1	6	2	DNA topoisomerases, Type I, ATP-independent
Megasphaera elsdenii DSM20460	1	1	1	1	Quorum Sensing: Autoinducer-2 Synthesis
Megasphaera elsdenii DSM20460	1	1	8	3	Cell Division Cluster
Megasphaera elsdenii DSM20460	1	0	6	1	Accessory Gene Regulator
Megasphaera elsdenii DSM20460	1	1	9	2	Ribonuclease H
Megasphaera elsdenii DSM20460	1	0	7	1	Tetracycline resistance, ribosome protection type
Megasphaera elsdenii DSM20460	1	0	7	1	Aminotransferases:Aromatic Pathway and More, A work in progress
Megasphaera elsdenii DSM20460	1	0	15	2	Fructose and Mannose Inducible PTS
Megasphaera elsdenii DSM20460	1	0	8	2	Sucrose-specific PTS
Megasphaera elsdenii DSM20460	1	1	4	2	Differentiation in bacteria:transcription factors and signaling systems
Megasphaera elsdenii DSM20460	1	1	1	1	CSBB-630.2.peg.1023
Megasphaera elsdenii DSM20460	1	1	2	2	GroEL GroES
Megasphaera elsdenii DSM20460	1	1	3	1	Zinc resistance
Megasphaera elsdenii DSM20460	1	1	1	1	Trans-translation by stalled ribosomes
Megaspheara sp. NM10 (DSM25563)	1	1	1	1	Trans-translation by stalled ribosomes
